# Supplementary material for: STAT3-mediated allelic imbalance of novel genetic variant Rs1047643 and B-cell-specific super-enhancer in association with systemic lupus erythematosus
Source: eLife. 2022 Feb 21;11:e72837. doi: 10.7554/eLife.72837 (PMC8884724; doi:10.7554/eLife.72837)
Supplement: Supplementary file 1. — Functional genomics data sets, including ATAC-seq, RNA-seq and RRBS-seq data sets from seven SLE case-control studies (Supplementary file 2), and Hi-C data sets in multiple cell lines, and a SNP microarray data set from a lupus GWAS study. [file elife-72837-supp1.xlsx]

## Sheet: Table S1
Stage	Data set (Accession ID)	Data description	Assay type	Samples, n (SLE vs Control)	Main Purpose
I
	GSE118253	ATAC-Seq data in B cell subsets from a SLE case-control study	ATAC-seq	41 (14 vs 27)	Allelic imbalance analysis
	GSE71338	ATAC-Seq data in naive B cells from a SLE case-control study	ATAC-seq	8 (4 vs 4)	Allelic imbalance analysis
II
	GSE139359	ATAC-Seq data in Neutrophil cells from a SLE case-control study	ATAC-seq	24 (16 vs 8)	Quantitative analysis of open chromatin regions
	GSE110017	ATAC-Seq data in two T cell subsets from a SLE study	ATAC-seq	6 (6 vs 0)	Quantitative analysis of open chromatin regions
	GSE118254	Transcriptomic data in B cell subsets from a SLE case-control study	RNA-seq	76 (42 vs 34)	Allelic expression analysis
	GSE92387	Transcriptomic data in B cell subsets from a SLE case-control study	RNA-seq	24 (12 vs 12)	Gene expression analysis
	GSE118255	DNA methylation data in B cell subsets from a SLE case-control study	RRBS-seq	85 (45 vs 40)	DNA methylation analysis
	GSE63525	Long-range chromatin interaction data on seven human cell types	Hi-C	7	Chromatin loop analysis
	GSE113405	Long-range chromatin interaction data in HepG2 cells	Hi-C	1	Chromatin loop analysis
	GSE81503	DNA Looping Interactions in Capture Hi-C data in GM12878 cells	Capture Hi-C (CHi-C)	1	Chromatin loop analysis
	E-MTAB-6621	DNA Looping Interactions in Capture Hi-C data in Tonsil-derived T-cells	Capture Hi-C (CHi-C)	6	Chromatin loop analysis
	phs001025.v1	Hispanic Lupus GWAS Study	Microarray	2279 (1393 vs 886)	SNP association analysis
