# Supplementary material for: STAT3-mediated allelic imbalance of novel genetic variant Rs1047643 and B-cell-specific super-enhancer in association with systemic lupus erythematosus
Source: eLife. 2022 Feb 21;11:e72837. doi: 10.7554/eLife.72837 (PMC8884724; doi:10.7554/eLife.72837)
Supplement: Supplementary file 2. [file elife-72837-supp2.xlsx]

## Sheet: Table S2
GSE ID	GSM ID	Group	Assay Type	Cell type
GSE118253	GSM3323580	CNTL	ATAC-seq	Activated Naive B cells (aN)
GSE118253	GSM3323581	CNTL	ATAC-seq	Double negative B cells (DN2)
GSE118253	GSM3323583	CNTL	ATAC-seq	Resting Naive B cells (rN)
GSE118253	GSM3323584	CNTL	ATAC-seq	Switched Memory B cells (SM)
GSE118253	GSM3323585	CNTL	ATAC-seq	Transitional 3 B cells (T3)
GSE118253	GSM3323586	CNTL	ATAC-seq	Double negative B cells (DN2)
GSE118253	GSM3323588	CNTL	ATAC-seq	Resting Naive B cells (rN)
GSE118253	GSM3323589	CNTL	ATAC-seq	Activated Naive B cells (aN)
GSE118253	GSM3323590	CNTL	ATAC-seq	Double negative B cells (DN2)
GSE118253	GSM3323592	CNTL	ATAC-seq	Resting Naive B cells (rN)
GSE118253	GSM3323593	CNTL	ATAC-seq	Switched Memory B cells (SM)
GSE118253	GSM3323594	CNTL	ATAC-seq	Transitional 3 B cells (T3)
GSE118253	GSM3323596	CNTL	ATAC-seq	Resting Naive B cells (rN)
GSE118253	GSM3323597	CNTL	ATAC-seq	Transitional 3 B cells (T3)
GSE118253	GSM3323598	CNTL	ATAC-seq	Double negative B cells (DN2)
GSE118253	GSM3323600	CNTL	ATAC-seq	Switched Memory B cells (SM)
GSE118253	GSM3323601	CNTL	ATAC-seq	Transitional 3 B cells (T3)
GSE118253	GSM3323602	CNTL	ATAC-seq	Activated Naive B cells (aN)
GSE118253	GSM3323604	CNTL	ATAC-seq	Switched Memory B cells (SM)
GSE118253	GSM3323605	CNTL	ATAC-seq	Transitional 3 B cells (T3)
GSE118253	GSM3323606	CNTL	ATAC-seq	Double negative B cells (DN2)
GSE118253	GSM3323608	CNTL	ATAC-seq	Switched Memory B cells (SM)
GSE118253	GSM3323609	CNTL	ATAC-seq	Transitional 3 B cells (T3)
GSE118253	GSM3323610	CNTL	ATAC-seq	Activated Naive B cells (aN)
GSE118253	GSM3323611	CNTL	ATAC-seq	Double negative B cells (DN2)
GSE118253	GSM3323613	CNTL	ATAC-seq	Switched Memory B cells (SM)
GSE118253	GSM3323614	CNTL	ATAC-seq	Transitional 3 B cells (T3)
GSE118253	GSM3323615	SLE	ATAC-seq	Activated Naive B cells (aN)
GSE118253	GSM3323616	SLE	ATAC-seq	Double negative B cells (DN2)
GSE118253	GSM3323617	SLE	ATAC-seq	Switched Memory B cells (SM)
GSE118253	GSM3323618	SLE	ATAC-seq	Transitional 3 B cells (T3)
GSE118253	GSM3323619	SLE	ATAC-seq	Activated Naive B cells (aN)
GSE118253	GSM3323620	SLE	ATAC-seq	Double negative B cells (DN2)
GSE118253	GSM3323621	SLE	ATAC-seq	Switched Memory B cells (SM)
GSE118253	GSM3323622	SLE	ATAC-seq	Transitional 3 B cells (T3)
GSE118253	GSM3323623	SLE	ATAC-seq	Double negative B cells (DN2)
GSE118253	GSM3323624	SLE	ATAC-seq	Switched Memory B cells (SM)
GSE118253	GSM3323625	SLE	ATAC-seq	Activated Naive B cells (aN)
GSE118253	GSM3323626	SLE	ATAC-seq	Double negative B cells (DN2)
GSE118253	GSM3323628	SLE	ATAC-seq	Switched Memory B cells (SM)
GSE118253	GSM3323629	SLE	ATAC-seq	Transitional 3 B cells (T3)
GSE71338	GSM2058522	CNTL	ATAC-Seq	Naive B cell
GSE71338	GSM2058523	CNTL	ATAC-Seq	Naive B cell
GSE71338	GSM2058524	CNTL	ATAC-Seq	Naive B cell
GSE71338	GSM2058525	CNTL	ATAC-Seq	Naive B cell
GSE71338	GSM2058526	SLE	ATAC-Seq	Naive B cell
GSE71338	GSM2058527	SLE	ATAC-Seq	Naive B cell
GSE71338	GSM2058528	SLE	ATAC-Seq	Naive B cell
GSE71338	GSM2058529	SLE	ATAC-Seq	Naive B cell
GSE118254	GSM3323630	Control	RNA-Seq	Activated Naive B cells (aN)
GSE118254	GSM3323631	Control	RNA-Seq	Double negative B cells (DN2)
GSE118254	GSM3323632	Control	RNA-Seq	Switched Memory B cells (SM)
GSE118254	GSM3323633	Control	RNA-Seq	Transitional 3 B cells (T3)
GSE118254	GSM3323634	Control	RNA-Seq	Resting Naive B cells (rN)
GSE118254	GSM3323635	Control	RNA-Seq	Switched Memory B cells (SM)
GSE118254	GSM3323636	Control	RNA-Seq	Transitional 3 B cells (T3)
GSE118254	GSM3323637	Control	RNA-Seq	Double negative B cells (DN2)
GSE118254	GSM3323638	Control	RNA-Seq	Resting Naive B cells (rN)
GSE118254	GSM3323639	Control	RNA-Seq	Switched Memory B cells (SM)
GSE118254	GSM3323640	Control	RNA-Seq	Transitional 3 B cells (T3)
GSE118254	GSM3323641	Control	RNA-Seq	Activated Naive B cells (aN)
GSE118254	GSM3323642	Control	RNA-Seq	Double negative B cells (DN2)
GSE118254	GSM3323644	Control	RNA-Seq	Resting Naive B cells (rN)
GSE118254	GSM3323645	Control	RNA-Seq	Switched Memory B cells (SM)
GSE118254	GSM3323646	Control	RNA-Seq	Transitional 3 B cells (T3)
GSE118254	GSM3323647	Control	RNA-Seq	Activated Naive B cells (aN)
GSE118254	GSM3323648	Control	RNA-Seq	Switched Memory B cells (SM)
GSE118254	GSM3323649	Control	RNA-Seq	Transitional 3 B cells (T3)
GSE118254	GSM3323650	Control	RNA-Seq	Activated Naive B cells (aN)
GSE118254	GSM3323651	Control	RNA-Seq	Double negative B cells (DN2)
GSE118254	GSM3323652	Control	RNA-Seq	Resting Naive B cells (rN)
GSE118254	GSM3323653	Control	RNA-Seq	Switched Memory B cells (SM)
GSE118254	GSM3323654	Control	RNA-Seq	Transitional 3 B cells (T3)
GSE118254	GSM3323655	Control	RNA-Seq	Activated Naive B cells (aN)
GSE118254	GSM3323656	Control	RNA-Seq	Double negative B cells (DN2)
GSE118254	GSM3323658	Control	RNA-Seq	Resting Naive B cells (rN)
GSE118254	GSM3323660	Control	RNA-Seq	Transitional 3 B cells (T3)
GSE118254	GSM3323659	Control	RNA-Seq	Switched Memory B cells (SM)
GSE118254	GSM3323661	Control	RNA-Seq	Activated Naive B cells (aN)
GSE118254	GSM3323662	Control	RNA-Seq	Double negative B cells (DN2)
GSE118254	GSM3323664	Control	RNA-Seq	Resting Naive B cells (rN)
GSE118254	GSM3323665	Control	RNA-Seq	Switched Memory B cells (SM)
GSE118254	GSM3323666	Control	RNA-Seq	Transitional 3 B cells (T3)
GSE118254	GSM3323667	SLE	RNA-Seq	Activated Naive B cells (aN)
GSE118254	GSM3323668	SLE	RNA-Seq	Double negative B cells (DN2)
GSE118254	GSM3323670	SLE	RNA-Seq	Resting Naive B cells (rN)
GSE118254	GSM3323671	SLE	RNA-Seq	Switched Memory B cells (SM)
GSE118254	GSM3323672	SLE	RNA-Seq	Transitional 3 B cells (T3)
GSE118254	GSM3323673	SLE	RNA-Seq	Activated Naive B cells (aN)
GSE118254	GSM3323674	SLE	RNA-Seq	Double negative B cells (DN2)
GSE118254	GSM3323675	SLE	RNA-Seq	Resting Naive B cells (rN)
GSE118254	GSM3323676	SLE	RNA-Seq	Switched Memory B cells (SM)
GSE118254	GSM3323677	SLE	RNA-Seq	Transitional 3 B cells (T3)
GSE118254	GSM3323678	SLE	RNA-Seq	Activated Naive B cells (aN)
GSE118254	GSM3323679	SLE	RNA-Seq	Double negative B cells (DN2)
GSE118254	GSM3323681	SLE	RNA-Seq	Resting Naive B cells (rN)
GSE118254	GSM3323682	SLE	RNA-Seq	Switched Memory B cells (SM)
GSE118254	GSM3323683	SLE	RNA-Seq	Transitional 3 B cells (T3)
GSE118254	GSM3323684	SLE	RNA-Seq	Activated Naive B cells (aN)
GSE118254	GSM3323685	SLE	RNA-Seq	Double negative B cells (DN2)
GSE118254	GSM3323688	SLE	RNA-Seq	Switched Memory B cells (SM)
GSE118254	GSM3323687	SLE	RNA-Seq	Resting Naive B cells (rN)
GSE118254	GSM3323689	SLE	RNA-Seq	Transitional 3 B cells (T3)
GSE118254	GSM3323690	SLE	RNA-Seq	Activated Naive B cells (aN)
GSE118254	GSM3323691	SLE	RNA-Seq	Double negative B cells (DN2)
GSE118254	GSM3323692	SLE	RNA-Seq	Resting Naive B cells (rN)
GSE118254	GSM3323694	SLE	RNA-Seq	Transitional 3 B cells (T3)
GSE118254	GSM3323693	SLE	RNA-Seq	Switched Memory B cells (SM)
GSE118254	GSM3323695	SLE	RNA-Seq	Switched Memory B cells (SM)
GSE118254	GSM3323696	SLE	RNA-Seq	Transitional 3 B cells (T3)
GSE118254	GSM3323697	SLE	RNA-Seq	Activated Naive B cells (aN)
GSE118254	GSM3323699	SLE	RNA-Seq	Resting Naive B cells (rN)
GSE118254	GSM3323698	SLE	RNA-Seq	Double negative B cells (DN2)
GSE118254	GSM3323700	SLE	RNA-Seq	Switched Memory B cells (SM)
GSE118254	GSM3323701	SLE	RNA-Seq	Transitional 3 B cells (T3)
GSE118254	GSM3323702	SLE	RNA-Seq	Double negative B cells (DN2)
GSE118254	GSM3323704	SLE	RNA-Seq	Switched Memory B cells (SM)
GSE118254	GSM3323703	SLE	RNA-Seq	Resting Naive B cells (rN)
GSE118254	GSM3323705	SLE	RNA-Seq	Transitional 3 B cells (T3)
GSE118254	GSM3323706	SLE	RNA-Seq	Resting Naive B cells (rN)
GSE118254	GSM3323707	SLE	RNA-Seq	Activated Naive B cells (aN)
GSE118254	GSM3323708	SLE	RNA-Seq	Double negative B cells (DN2)
GSE118254	GSM3323710	SLE	RNA-Seq	Resting Naive B cells (rN)
GSE118254	GSM3323711	SLE	RNA-Seq	Switched Memory B cells (SM)
GSE118254	GSM3323712	SLE	RNA-Seq	Transitional 3 B cells (T3)
GSE92387	GSM2428862	SLE	RNA-Seq	Naïve B cell
GSE92387	GSM2428863	SLE	RNA-Seq	Switched memory
GSE92387	GSM2428864	SLE	RNA-Seq	Double negative 1
GSE92387	GSM2428865	SLE	RNA-Seq	Double negative 2
GSE92387	GSM2428866	SLE	RNA-Seq	Naïve
GSE92387	GSM2428867	SLE	RNA-Seq	Switched memory
GSE92387	GSM2428868	SLE	RNA-Seq	Double negative 1
GSE92387	GSM2428869	SLE	RNA-Seq	Double negative 2
GSE92387	GSM2428870	SLE	RNA-Seq	Naïve
GSE92387	GSM2428871	SLE	RNA-Seq	Switched memory
GSE92387	GSM2428872	SLE	RNA-Seq	Double negative 1
GSE92387	GSM2428873	SLE	RNA-Seq	Double negative 2
GSE92387	GSM2428874	CNTL	RNA-Seq	Naïve
GSE92387	GSM2428875	CNTL	RNA-Seq	Switched memory
GSE92387	GSM2428876	CNTL	RNA-Seq	Double negative 1
GSE92387	GSM2428877	CNTL	RNA-Seq	Double negative 2
GSE92387	GSM2428878	CNTL	RNA-Seq	Naïve
GSE92387	GSM2428879	CNTL	RNA-Seq	Switched memory
GSE92387	GSM2428880	CNTL	RNA-Seq	Double negative 1
GSE92387	GSM2428881	CNTL	RNA-Seq	Double negative 2
GSE92387	GSM2428882	CNTL	RNA-Seq	Naïve
GSE92387	GSM2428883	CNTL	RNA-Seq	Switched memory
GSE92387	GSM2428884	CNTL	RNA-Seq	Double negative 1
GSE92387	GSM2428885	CNTL	RNA-Seq	Double negative 2
GSE139359	GSM4138735	CNTL	ATAC-seq	NDN
GSE139359	GSM4138736	CNTL	ATAC-seq	NDN
GSE139359	GSM4138737	CNTL	ATAC-seq	NDN
GSE139359	GSM4138738	CNTL	ATAC-seq	NDN
GSE139359	GSM4138739	CNTL	ATAC-seq	NDN
GSE139359	GSM4138740	CNTL	ATAC-seq	NDN
GSE139359	GSM4138741	CNTL	ATAC-seq	NDN
GSE139359	GSM4138742	CNTL	ATAC-seq	NDN
GSE139359	GSM4138743	SLE	ATAC-seq	NDN
GSE139359	GSM4138744	SLE	ATAC-seq	NDN
GSE139359	GSM4138745	SLE	ATAC-seq	NDN
GSE139359	GSM4138746	SLE	ATAC-seq	NDN
GSE139359	GSM4138747	SLE	ATAC-seq	NDN
GSE139359	GSM4138748	SLE	ATAC-seq	NDN
GSE139359	GSM4138749	SLE	ATAC-seq	NDN
GSE139359	GSM4138750	SLE	ATAC-seq	NDN
GSE139359	GSM4138751	SLE	ATAC-seq	LDG
GSE139359	GSM4138752	SLE	ATAC-seq	LDG
GSE139359	GSM4138753	SLE	ATAC-seq	LDG
GSE139359	GSM4138754	SLE	ATAC-seq	LDG
GSE139359	GSM4138755	SLE	ATAC-seq	LDG
GSE139359	GSM4138756	SLE	ATAC-seq	LDG
GSE139359	GSM4138757	SLE	ATAC-seq	LDG
GSE139359	GSM4138758	SLE	ATAC-seq	LDG
GSE110017	GSM2976426	SLE	ATAC-seq	CD4+ T (PD1hi)
GSE110017	GSM2976427	SLE	ATAC-seq	CD4+ T (Tfh)
GSE110017	GSM2976428	SLE	ATAC-seq	CD4+ T (PD1hi)
GSE110017	GSM2976429	SLE	ATAC-seq	CD4+ T (PD1hi)
GSE110017	GSM2976430	SLE	ATAC-seq	CD4+ T (Tfh)
GSE110017	GSM2976431	SLE	ATAC-seq	CD4+ T (PD1hi)
GSE118255	GSM3323713	CNTL	RRBS	Activated Naive B cells (aN)
GSE118255	GSM3323714	CNTL	RRBS	Double negative B cells (DN2)
GSE118255	GSM3323715	CNTL	RRBS	Resting Naive B cells (rN)
GSE118255	GSM3323716	CNTL	RRBS	Switched Memory B cells (SM)
GSE118255	GSM3323717	CNTL	RRBS	Transitional 3 B cells (T3)
GSE118255	GSM3323718	CNTL	RRBS	Activated Naive B cells (aN)
GSE118255	GSM3323719	CNTL	RRBS	Double negative B cells (DN2)
GSE118255	GSM3323720	CNTL	RRBS	Resting Naive B cells (rN)
GSE118255	GSM3323721	CNTL	RRBS	Switched Memory B cells (SM)
GSE118255	GSM3323722	CNTL	RRBS	Transitional 3 B cells (T3)
GSE118255	GSM3323723	CNTL	RRBS	Activated Naive B cells (aN)
GSE118255	GSM3323724	CNTL	RRBS	Double negative B cells (DN2)
GSE118255	GSM3323725	CNTL	RRBS	Resting Naive B cells (rN)
GSE118255	GSM3323726	CNTL	RRBS	Switched Memory B cells (SM)
GSE118255	GSM3323727	CNTL	RRBS	Transitional 3 B cells (T3)
GSE118255	GSM3323728	CNTL	RRBS	Activated Naive B cells (aN)
GSE118255	GSM3323729	CNTL	RRBS	Double negative B cells (DN2)
GSE118255	GSM3323730	CNTL	RRBS	Resting Naive B cells (rN)
GSE118255	GSM3323731	CNTL	RRBS	Switched Memory B cells (SM)
GSE118255	GSM3323732	CNTL	RRBS	Transitional 3 B cells (T3)
GSE118255	GSM3323733	CNTL	RRBS	Activated Naive B cells (aN)
GSE118255	GSM3323734	CNTL	RRBS	Double negative B cells (DN2)
GSE118255	GSM3323736	CNTL	RRBS	Resting Naive B cells (rN)
GSE118255	GSM3323737	CNTL	RRBS	Switched Memory B cells (SM)
GSE118255	GSM3323738	CNTL	RRBS	Transitional 3 B cells (T3)
GSE118255	GSM3323739	CNTL	RRBS	Activated Naive B cells (aN)
GSE118255	GSM3323740	CNTL	RRBS	Double negative B cells (DN2)
GSE118255	GSM3323741	CNTL	RRBS	Resting Naive B cells (rN)
GSE118255	GSM3323742	CNTL	RRBS	Switched Memory B cells (SM)
GSE118255	GSM3323743	CNTL	RRBS	Transitional 3 B cells (T3)
GSE118255	GSM3323744	CNTL	RRBS	Activated Naive B cells (aN)
GSE118255	GSM3323745	CNTL	RRBS	Double negative B cells (DN2)
GSE118255	GSM3323747	CNTL	RRBS	Resting Naive B cells (rN)
GSE118255	GSM3323748	CNTL	RRBS	Switched Memory B cells (SM)
GSE118255	GSM3323749	CNTL	RRBS	Transitional 3 B cells (T3)
GSE118255	GSM3323750	CNTL	RRBS	Activated Naive B cells (aN)
GSE118255	GSM3323751	CNTL	RRBS	Double negative B cells (DN2)
GSE118255	GSM3323753	CNTL	RRBS	Resting Naive B cells (rN)
GSE118255	GSM3323754	CNTL	RRBS	Switched Memory B cells (SM)
GSE118255	GSM3323755	CNTL	RRBS	Transitional 3 B cells (T3)
GSE118255	GSM3323756	SLE	RRBS	Activated Naive B cells (aN)
GSE118255	GSM3323757	SLE	RRBS	Double negative B cells (DN2)
GSE118255	GSM3323758	SLE	RRBS	Resting Naive B cells (rN)
GSE118255	GSM3323759	SLE	RRBS	Switched Memory B cells (SM)
GSE118255	GSM3323760	SLE	RRBS	Transitional 3 B cells (T3)
GSE118255	GSM3323761	SLE	RRBS	Activated Naive B cells (aN)
GSE118255	GSM3323762	SLE	RRBS	Double negative B cells (DN2)
GSE118255	GSM3323763	SLE	RRBS	Resting Naive B cells (rN)
GSE118255	GSM3323764	SLE	RRBS	Switched Memory B cells (SM)
GSE118255	GSM3323765	SLE	RRBS	Transitional 3 B cells (T3)
GSE118255	GSM3323766	SLE	RRBS	Activated Naive B cells (aN)
GSE118255	GSM3323767	SLE	RRBS	Double negative B cells (DN2)
GSE118255	GSM3323768	SLE	RRBS	Resting Naive B cells (rN)
GSE118255	GSM3323769	SLE	RRBS	Switched Memory B cells (SM)
GSE118255	GSM3323770	SLE	RRBS	Transitional 3 B cells (T3)
GSE118255	GSM3323771	SLE	RRBS	Activated Naive B cells (aN)
GSE118255	GSM3323772	SLE	RRBS	Double negative B cells (DN2)
GSE118255	GSM3323773	SLE	RRBS	Resting Naive B cells (rN)
GSE118255	GSM3323774	SLE	RRBS	Switched Memory B cells (SM)
GSE118255	GSM3323775	SLE	RRBS	Transitional 3 B cells (T3)
GSE118255	GSM3323776	SLE	RRBS	Activated Naive B cells (aN)
GSE118255	GSM3323777	SLE	RRBS	Double negative B cells (DN2)
GSE118255	GSM3323779	SLE	RRBS	Resting Naive B cells (rN)
GSE118255	GSM3323780	SLE	RRBS	Switched Memory B cells (SM)
GSE118255	GSM3323781	SLE	RRBS	Transitional 3 B cells (T3)
GSE118255	GSM3323782	SLE	RRBS	Activated Naive B cells (aN)
GSE118255	GSM3323783	SLE	RRBS	Double negative B cells (DN2)
GSE118255	GSM3323784	SLE	RRBS	Resting Naive B cells (rN)
GSE118255	GSM3323785	SLE	RRBS	Switched Memory B cells (SM)
GSE118255	GSM3323786	SLE	RRBS	Transitional 3 B cells (T3)
GSE118255	GSM3323787	SLE	RRBS	Activated Naive B cells (aN)
GSE118255	GSM3323788	SLE	RRBS	Double negative B cells (DN2)
GSE118255	GSM3323790	SLE	RRBS	Resting Naive B cells (rN)
GSE118255	GSM3323791	SLE	RRBS	Switched Memory B cells (SM)
GSE118255	GSM3323792	SLE	RRBS	Transitional 3 B cells (T3)
GSE118255	GSM3323793	SLE	RRBS	Activated Naive B cells (aN)
GSE118255	GSM3323794	SLE	RRBS	Double negative B cells (DN2)
GSE118255	GSM3323796	SLE	RRBS	Resting Naive B cells (rN)
GSE118255	GSM3323797	SLE	RRBS	Switched Memory B cells (SM)
GSE118255	GSM3323798	SLE	RRBS	Transitional 3 B cells (T3)
GSE118255	GSM3323799	SLE	RRBS	Activated Naive B cells (aN)
GSE118255	GSM3323800	SLE	RRBS	Double negative B cells (DN2)
GSE118255	GSM3323802	SLE	RRBS	Resting Naive B cells (rN)
GSE118255	GSM3323803	SLE	RRBS	Switched Memory B cells (SM)
GSE118255	GSM3323804	SLE	RRBS	Transitional 3 B cells (T3)
