# Supplementary material for: STAT3-mediated allelic imbalance of novel genetic variant Rs1047643 and B-cell-specific super-enhancer in association with systemic lupus erythematosus
Source: eLife. 2022 Feb 21;11:e72837. doi: 10.7554/eLife.72837 (PMC8884724; doi:10.7554/eLife.72837)
Supplement: Supplementary file 3. [file elife-72837-supp3.xlsx]

## Sheet: Table S3
rsid	Position (hg19)	other_allele	effect_allele	p-trend	OR (95% CI)	N case	N_control
rs1047643	chr8:11660362	T	C	0.0201353	0.91 (0.84-0.98)	5201	14267
