# Supplementary material for: STAT3-mediated allelic imbalance of novel genetic variant Rs1047643 and B-cell-specific super-enhancer in association with systemic lupus erythematosus
Source: eLife. 2022 Feb 21;11:e72837. doi: 10.7554/eLife.72837 (PMC8884724; doi:10.7554/eLife.72837)
Supplement: Supplementary file 4. [file elife-72837-supp4.xlsx]

## Sheet: Table S4
Population	LD score (r2) between SNP rs1047643 and 12 GWAS tag SNPs
	rs2618476	rs2736340	rs7812879	rs13277113	rs2254546	rs2061831	rs2618444	rs1478897	rs2736332	rs2736345	rs2736337	rs17807624
CEU	0.0763	0.0763	0.0338	0.0763	0.0338	0.0763	0.0763	0.0289	0.069	0.0411	0.0785	0.0943
