# Supplementary material for: STAT3-mediated allelic imbalance of novel genetic variant Rs1047643 and B-cell-specific super-enhancer in association with systemic lupus erythematosus
Source: eLife. 2022 Feb 21;11:e72837. doi: 10.7554/eLife.72837 (PMC8884724; doi:10.7554/eLife.72837)
Supplement: Supplementary file 5. [file elife-72837-supp5.xlsx]

## Sheet: Table S5
Primer name	Strand	Sequence	Purpose
GAPDH	Forward	TCACCAGGGCTGCTTTTAAC	RT-qPCR
	Reverse	TGACGGTGCCATGGAATTTG
FDFT1	Forward	GACCAGCAAGGAGGAAGAGAG	RT-qPCR
	Reverse	CCAAGTCAATATTCTCCGGCT
BLK	Forward	CTTGCTCCAATCAACAAGGC	RT-qPCR
	Reverse	TAGTGCTTGATCAGCTCCCC
rs1047643 allelic	Forward 1	TGGAGTTCGTGAAATGCCTT	Allelic qPCR
	Forward 2	TGGAGTTCGTGAAATGCCTC
	Reverse	CAAGCAGGGAGGCTCGG
SE5term_8p23	Forward	GGATGGATCTGCTGCCTTGT	ChIP qPCR
	Reverse	GCTGCTGGTGGGTGTTTTC
SE3term_8p23	Forward	TGGGGTGTTGAAGGCTGAAA	ChIP qPCR
	Reverse	CGGTGGGTAAGCAGTGTACT
ChIP negative control	Forward	CCTGGAGGGCTTGGAGATG	Control primers for ChIP qPCR
	Reverse	GATCCTACGGCTGGCTGTGA
