# Supplementary figures and images for: STAT3-mediated allelic imbalance of novel genetic variant Rs1047643 and B-cell-specific super-enhancer in association with systemic lupus erythematosus
Source: eLife journal article supplement (doi:10.7554/elife.72837), 2022-02-21

A

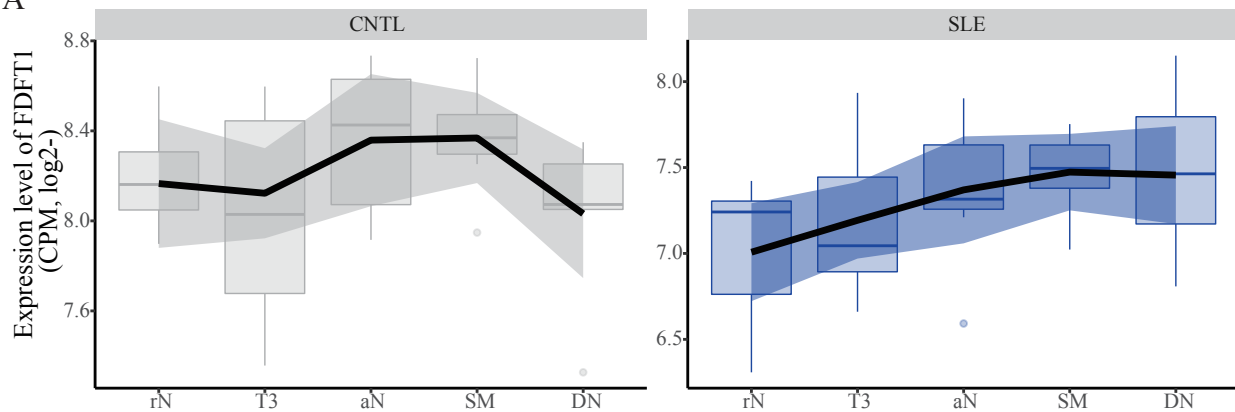

B

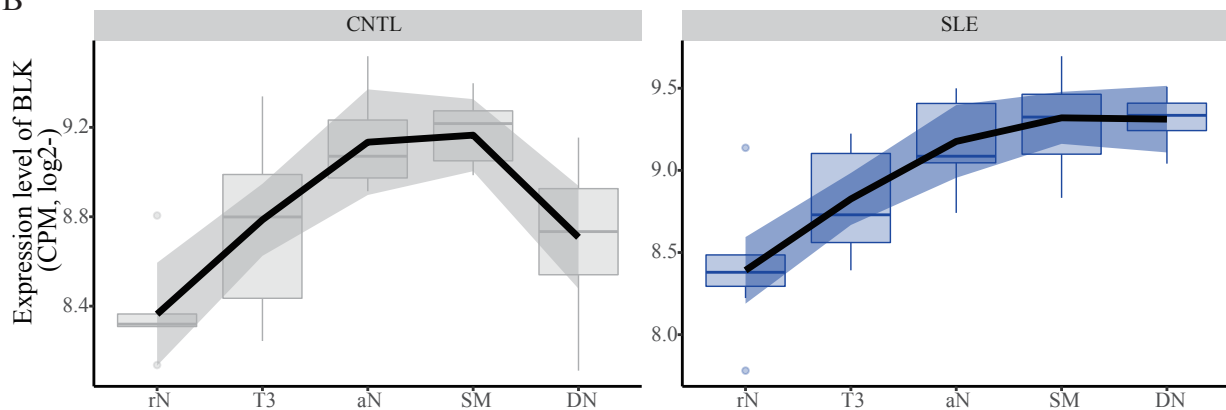

Supplement: supp [file elife-72837-supp-v1.zip]

A

## H3K27ac ChIP

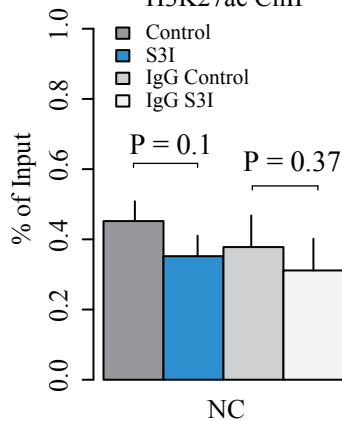

B

## H3K4me1 ChIP

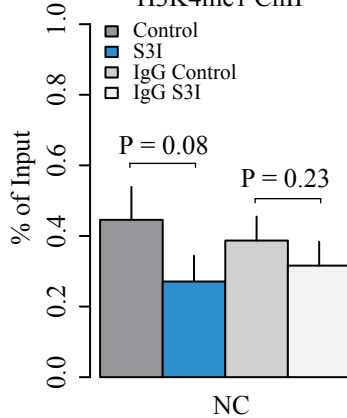

C

## pSTAT3 ChIP

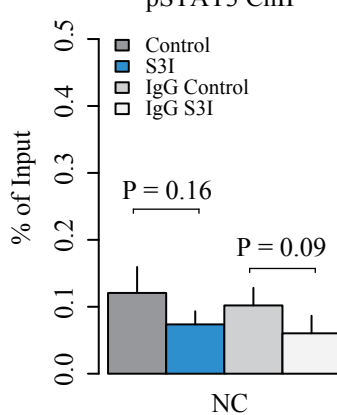

D

## H3K27ac ChIP

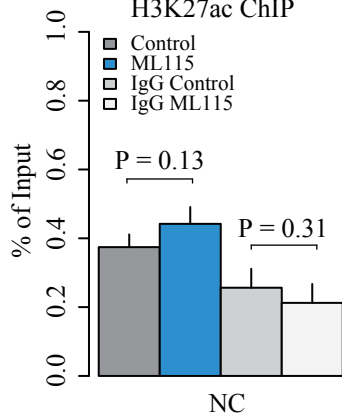

E

## H3K4me1 ChIP

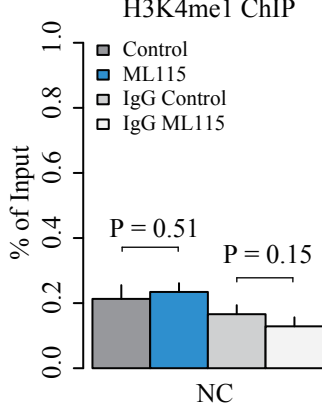

F

## pSTAT3 ChIP

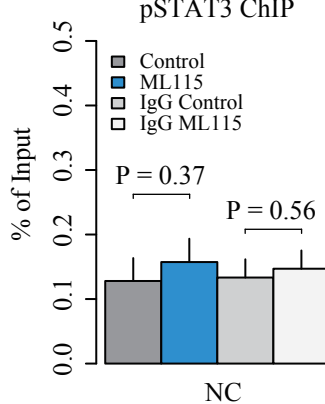

Supplement: supp [file elife-72837-supp-v1.zip]

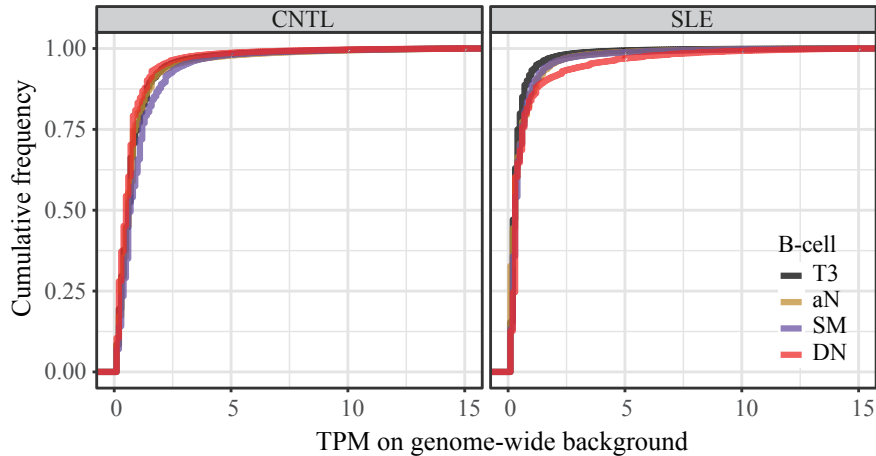

Q3

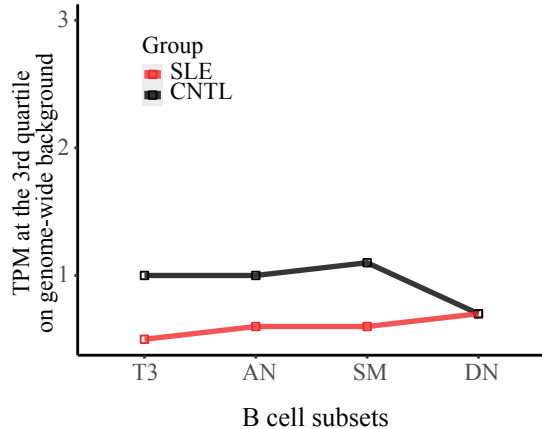

Supplement: supp [file elife-72837-supp-v1.zip]

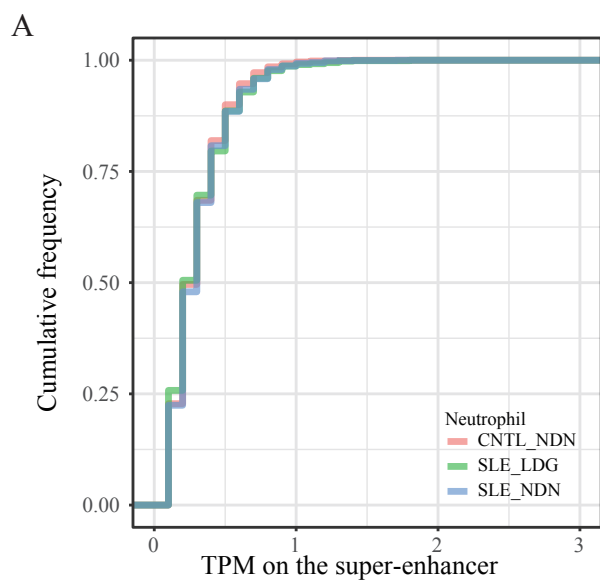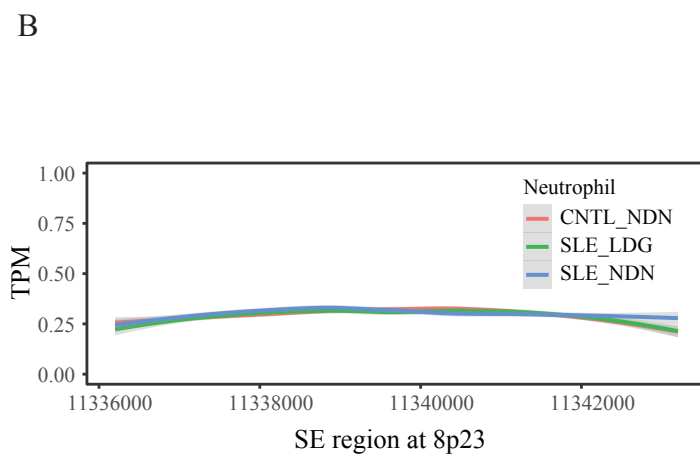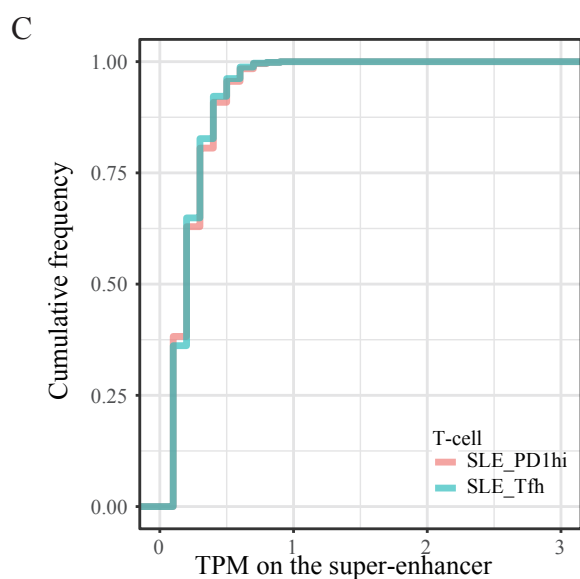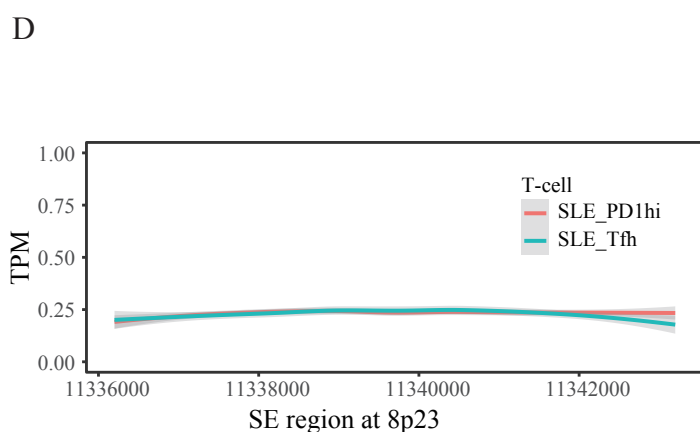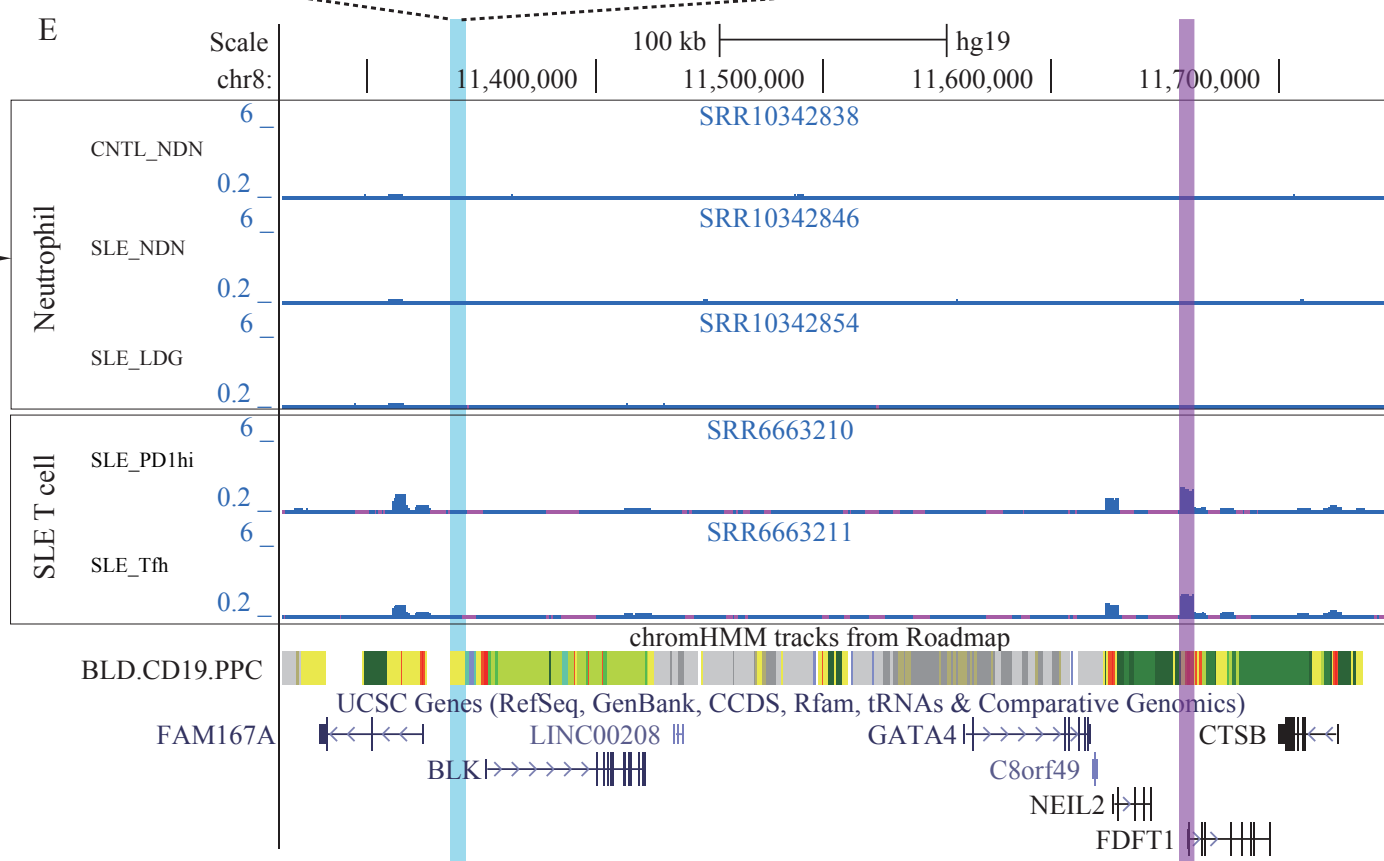

Supplement: supp [file elife-72837-supp-v1.zip]

# Amplification Plot

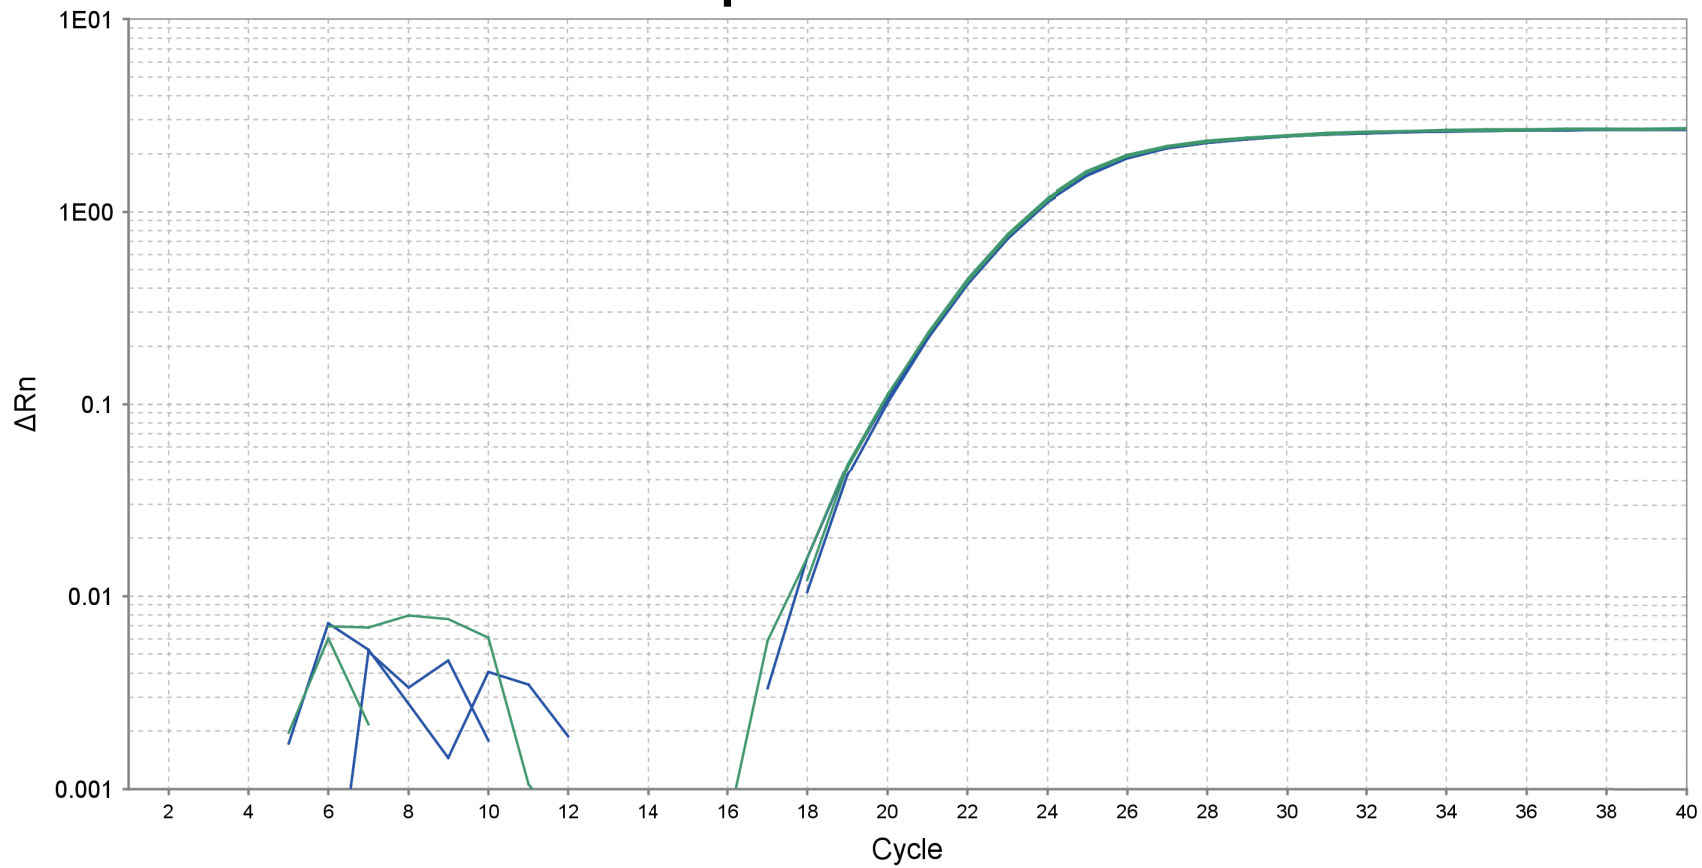

rs1047643\_T

rs1047643\_C

Supplement: supp [file elife-72837-supp-v1.zip]

A

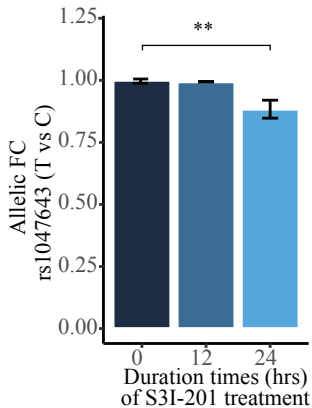

B

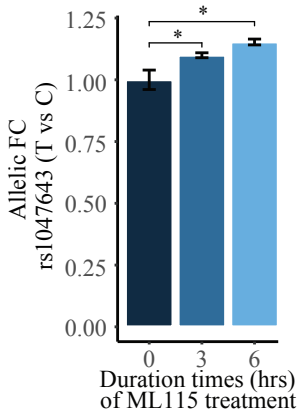

Supplement: supp [file elife-72837-supp-v1.zip]

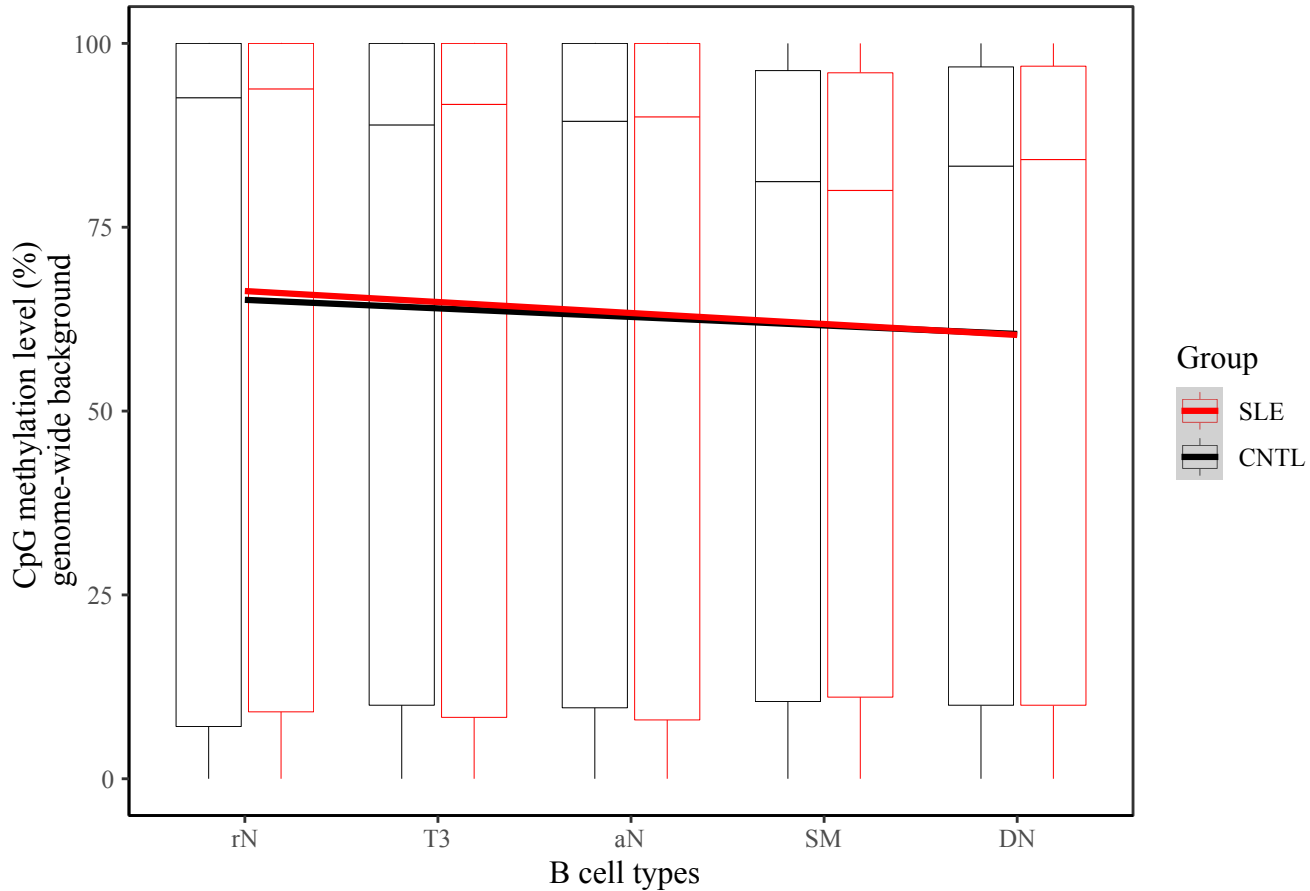

Supplement: supp [file elife-72837-supp-v1.zip]

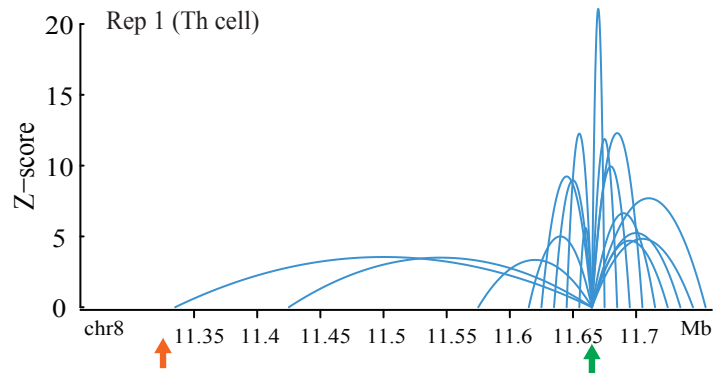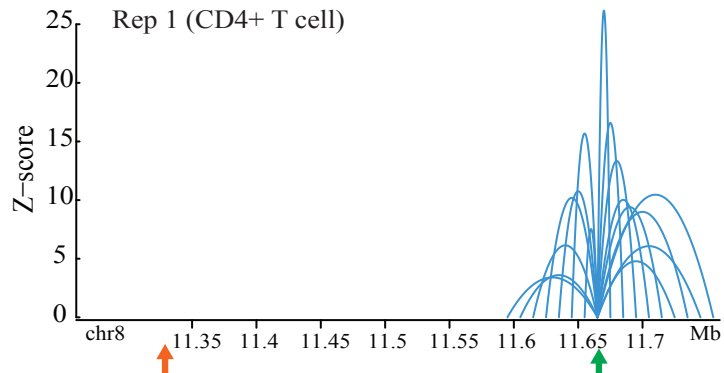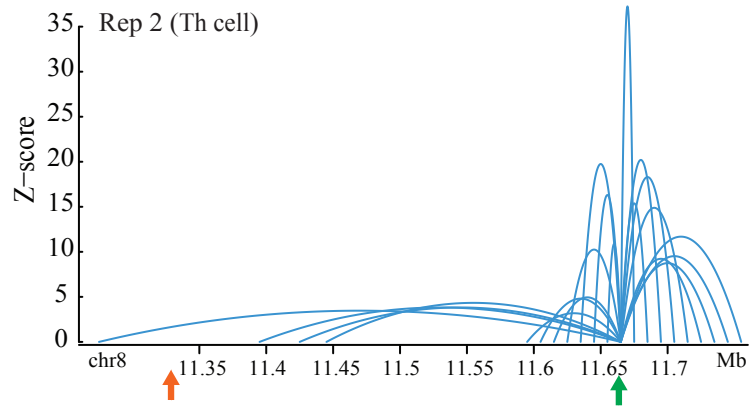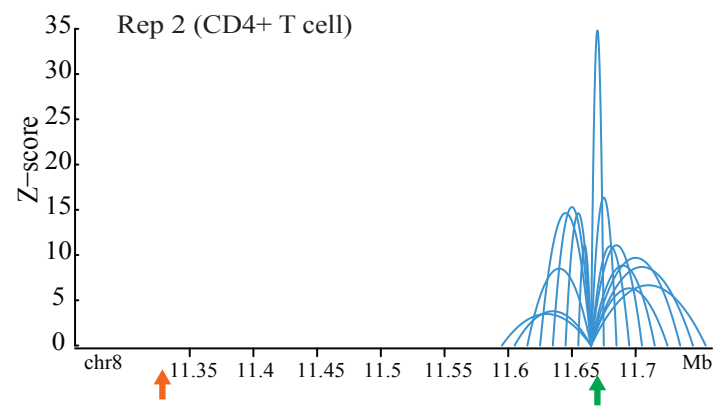

Supplement: supp [file elife-72837-supp-v1.zip]

A

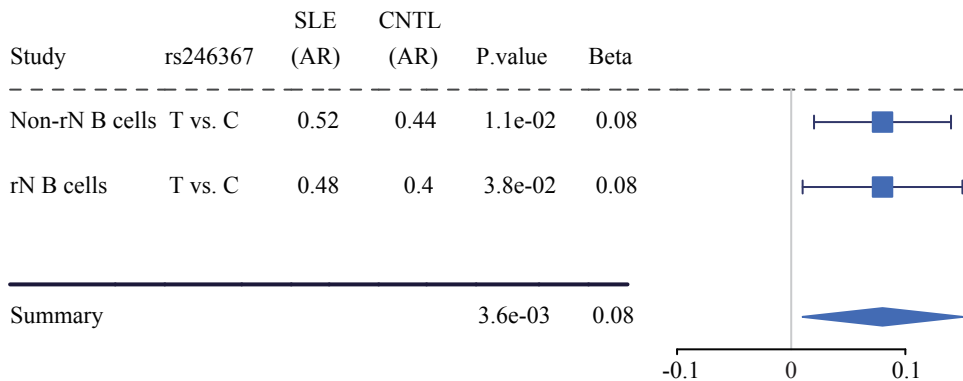

B

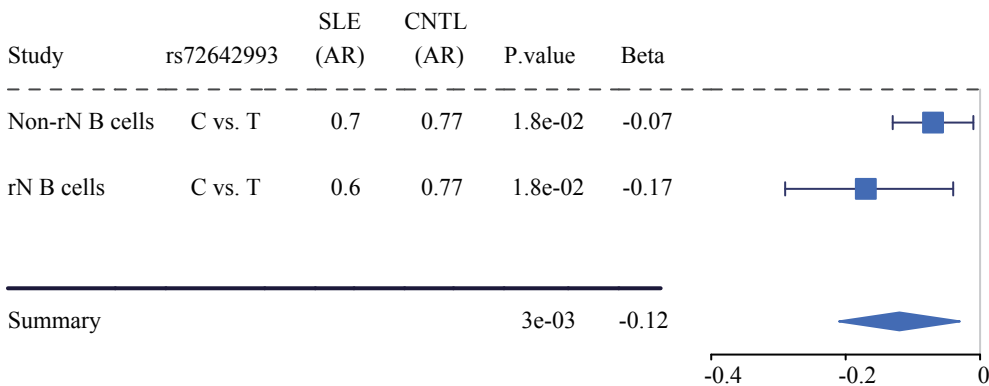

Supplement: supp [file elife-72837-supp-v1.zip]

A

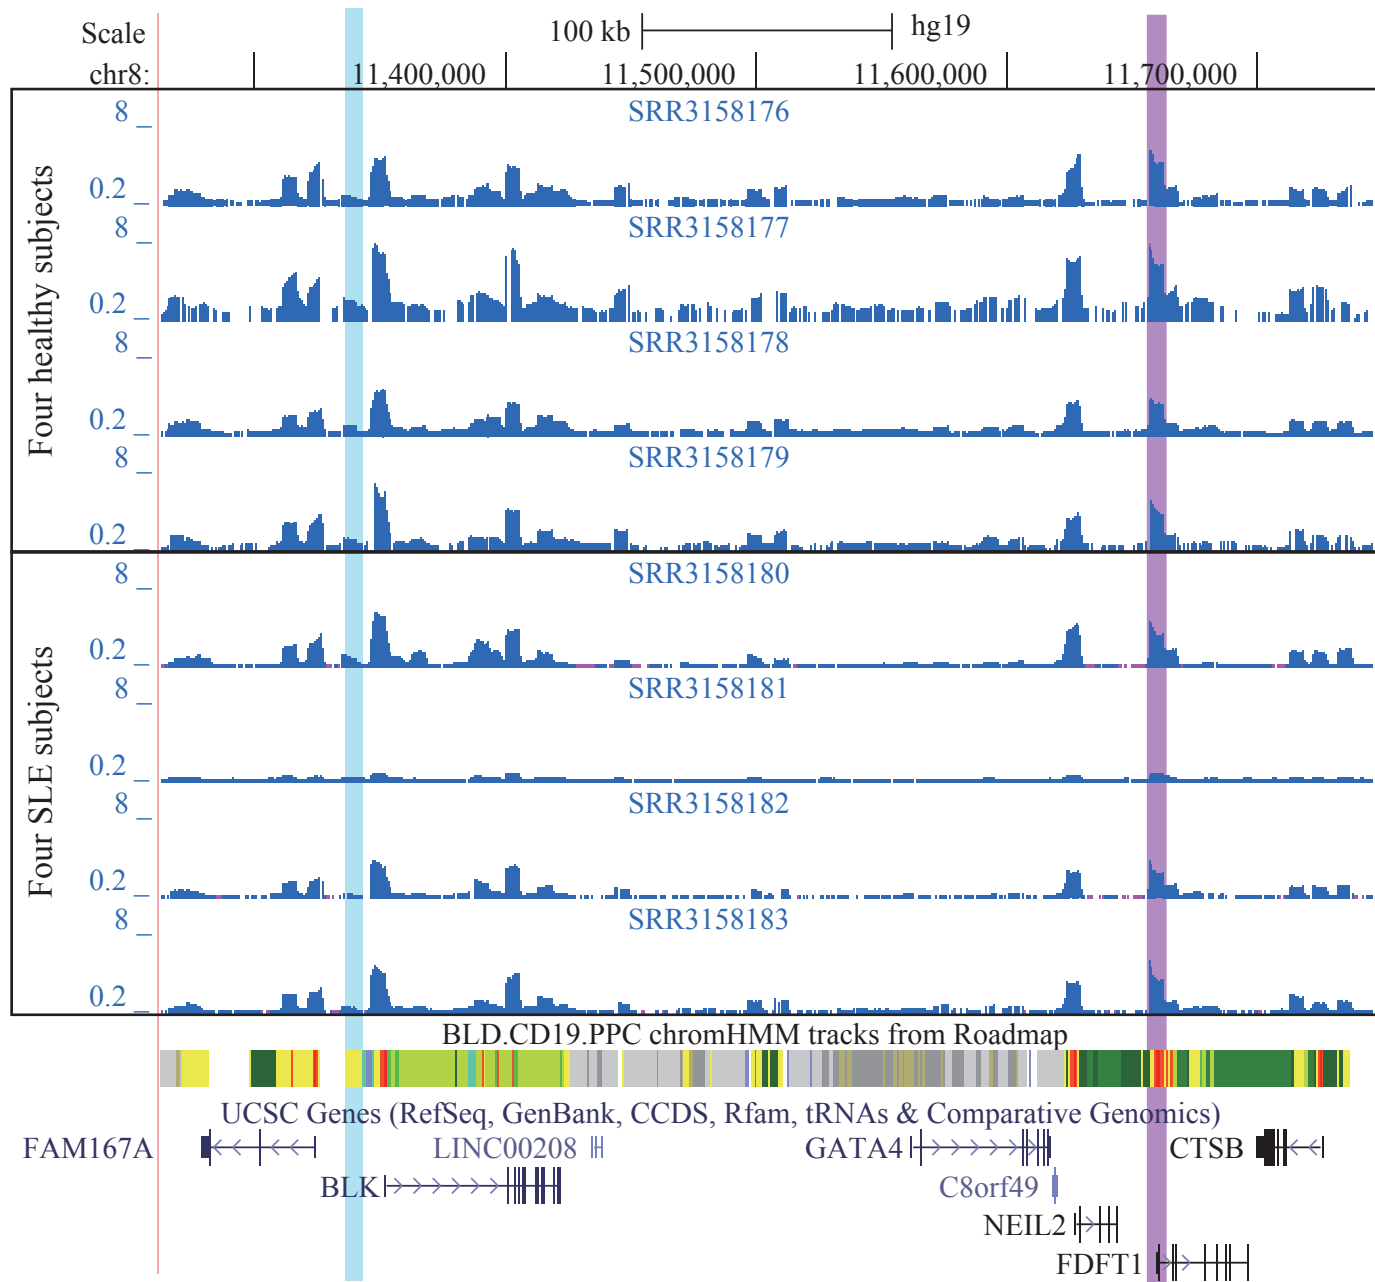

B

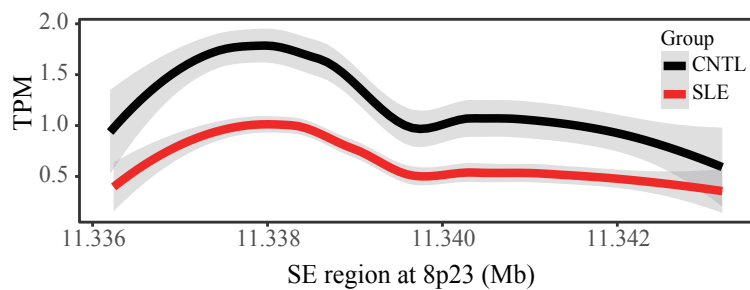

C

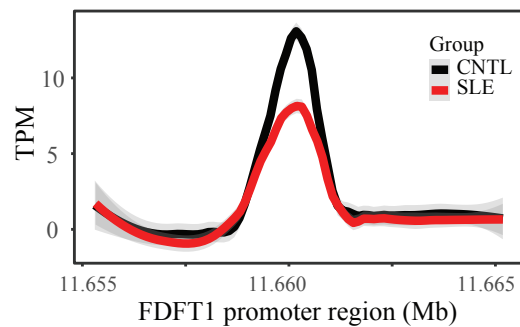

Supplement: supp [file elife-72837-supp-v1.zip]

A

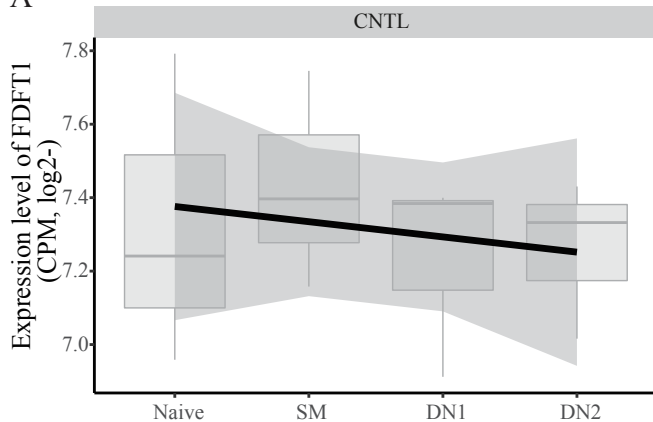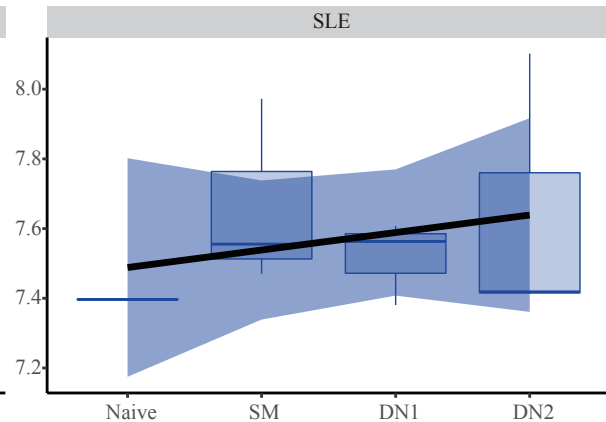

B

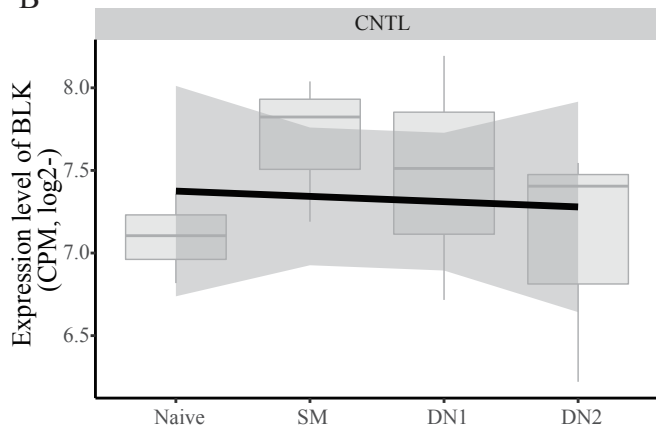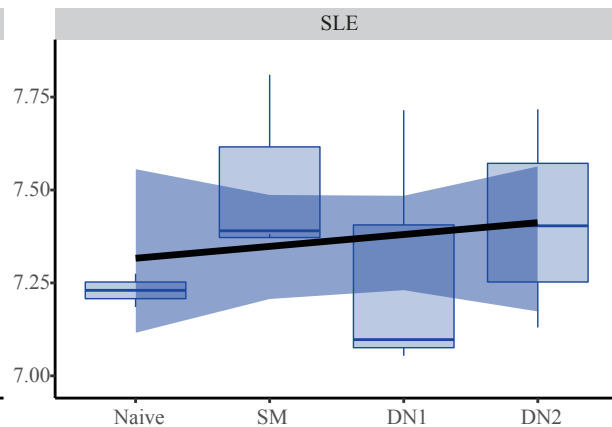

Supplement: supp [file elife-72837-supp-v1.zip]

A

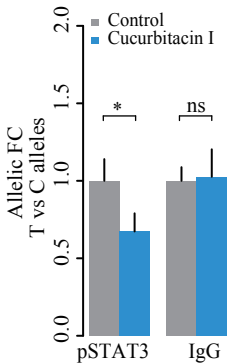

B

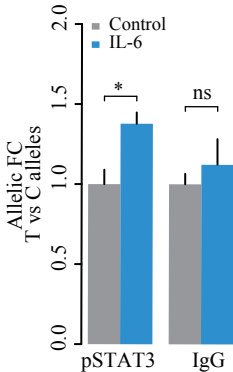

Supplement: supp [file elife-72837-supp-v1.zip]

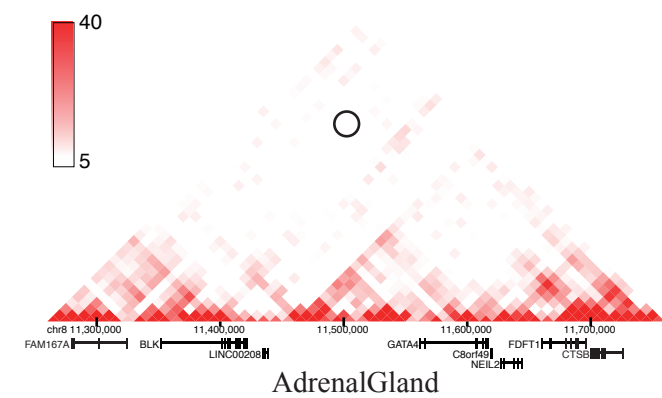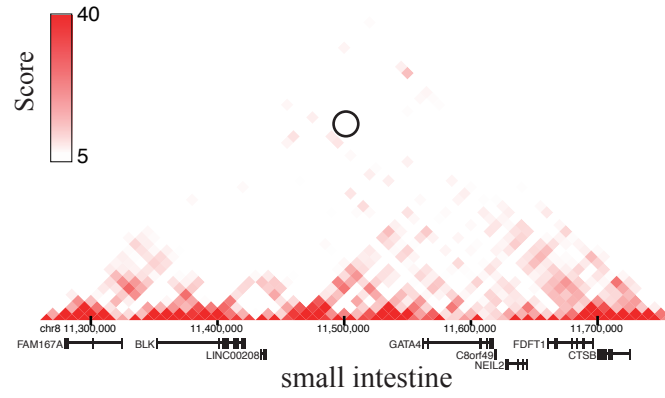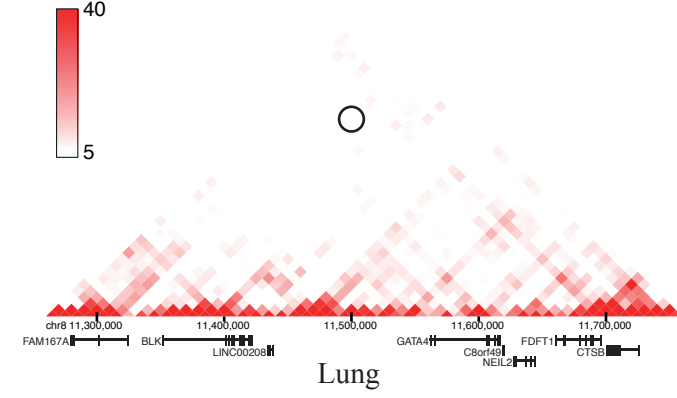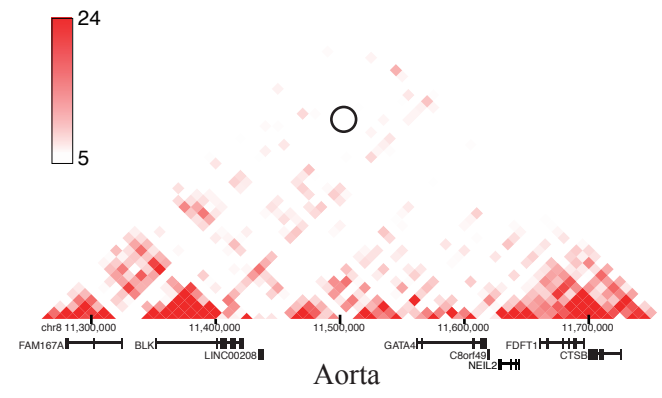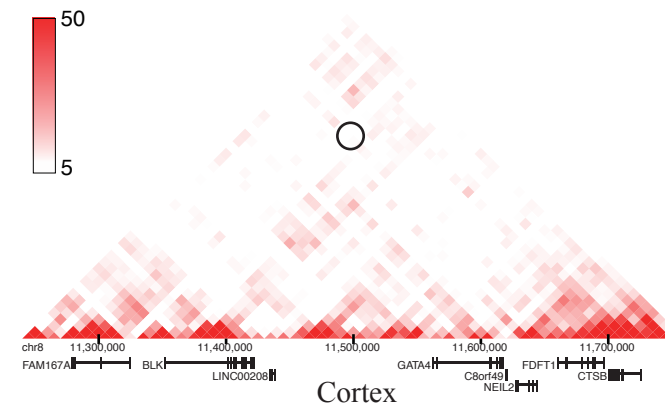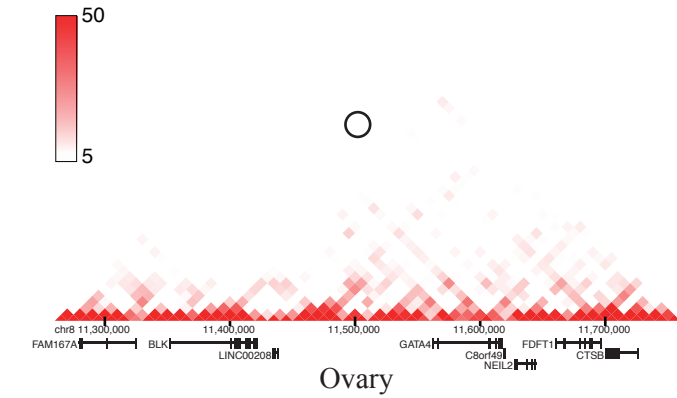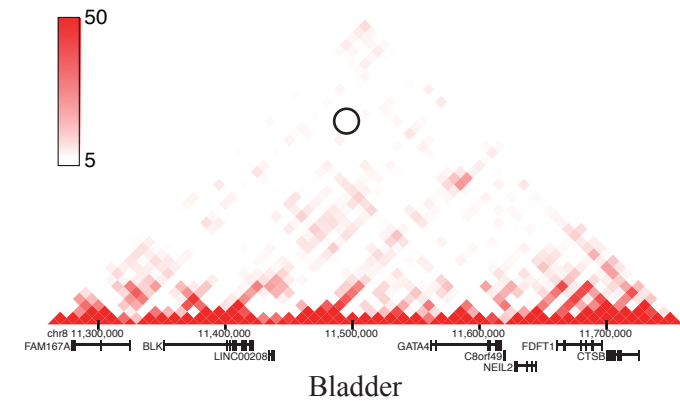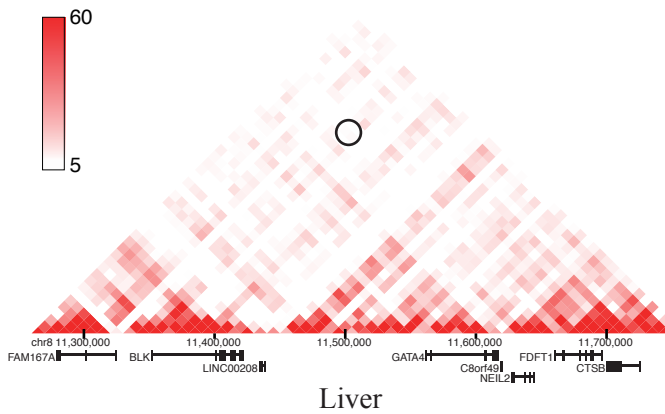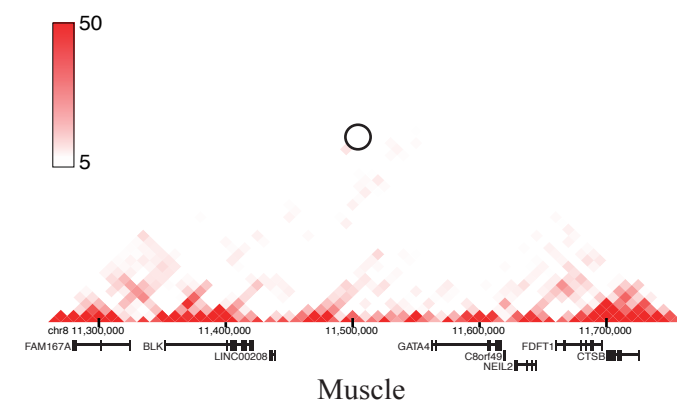

Supplement: supp [file elife-72837-supp-v1.zip]
